# Supplementary material for: Inferences of individual drug responses across diverse cancer types using a novel competing endogenous RNA network
Source: PubMed Central journal article supplement (PMC6120231; doi:10.1002/1878-0261.12181), 2018-07-14
Supplement: MOL2-12-1429-s001.pdf [file MOL2-12-1429-s001.pdf]

# **Supplemental files for “Inferences of individual drug responses across diverse cancer types using a novel competing endogenous RNA network”**

## **Identification of ceRNAs across various cancer types**

Human mature miRNA sequences were downloaded from the miRBase database (release 19) [1], and lncRNA sequences were obtained from the GENCODE database (v19) [2]. Previous studies indicated that lncRNAs could compete with mRNAs to bind miRNAs, which could then be detected using traditional miRNA target prediction algorithms [3-5]. The miRNA–lncRNA interactions were predicted using TargetScan (v.6.0) [6], PITA (March 2007 version) [7], miRanda (November 2010 version) [8] and RNAhybrid (v.2.1.1) [9] using the default parameters. To decrease the false positive rate of traditional prediction methods, miRNA–lncRNA interactions were filtered using AGO-CLIP-seq data [10], and then the experimentally validated miRNA–lncRNA interactions derived from DIANA-LncBase [10] and starBase v2.0 [11] were integrated. The miRNA–mRNA interactions were collected from TarBase (v6.0) [12] and mirTarBase (release 4.5) [13], which store manually curated collections of experimentally supported miRNA targets. For each cancer, the ceRNAs were identified by the following relationships. 1) miRNA–lncRNA and miRNA–mRNA interactions with a significant negative correlation of expression (Pearson correlation coefficient [PCC]  $< -0.3$ ,  $p < 0.05$ ) were retained [14, 15]. 2) The ceRNA triplet consisted of miRNA–lncRNA and miRNA–mRNA interactions sharing at least one miRNA [16]. 3) Expression of the lncRNA and mRNA in the ceRNA triplet were positively correlated (PCC  $> 0.3$ ,  $p < 0.05$ ) [17].

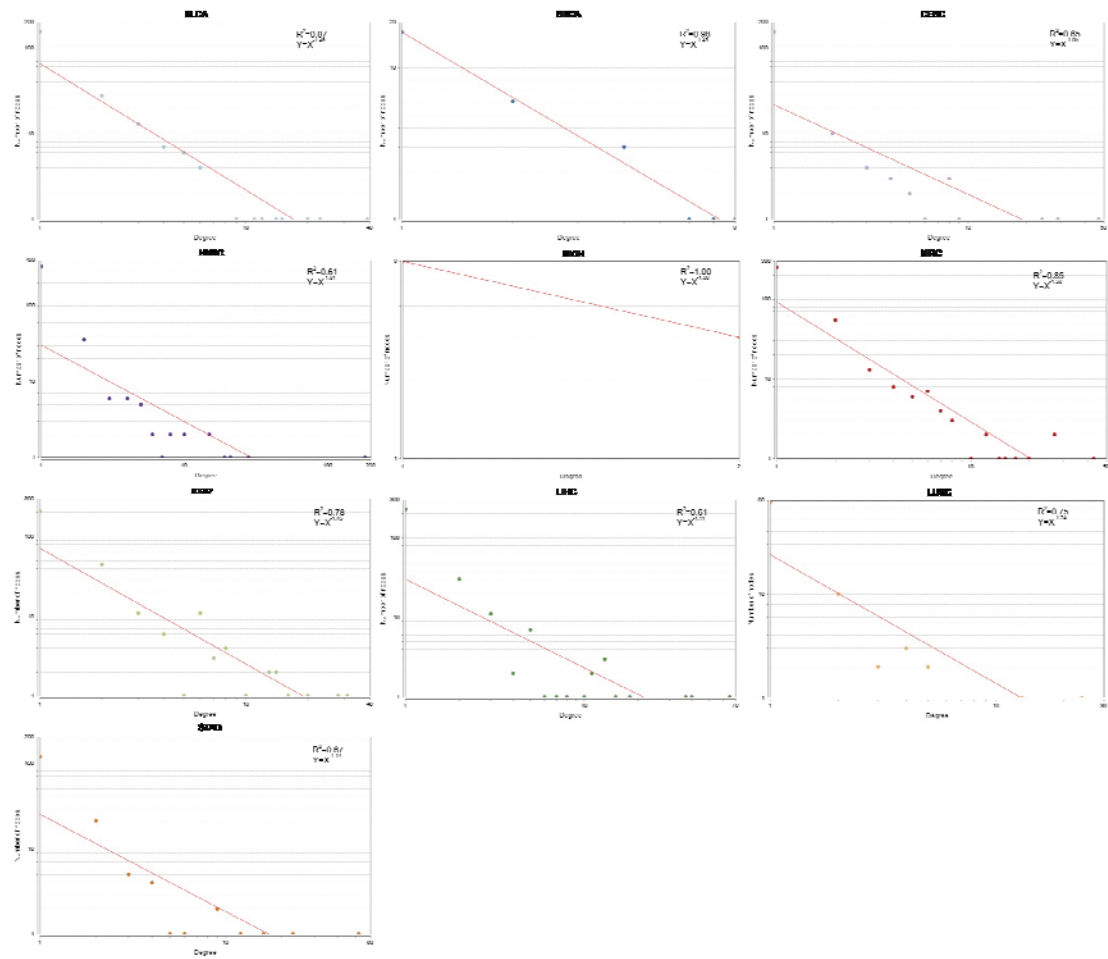

Figure S1. Degree distribution of the DRCE networks across 10 types of cancer. The x-axis is the ranked degree and the y-axis is the number of nodes at this rank. Most nodes are lowly connected and only a few are relatively highly connected. The examination of the degree distribution reveals a scale-free power-law distribution.

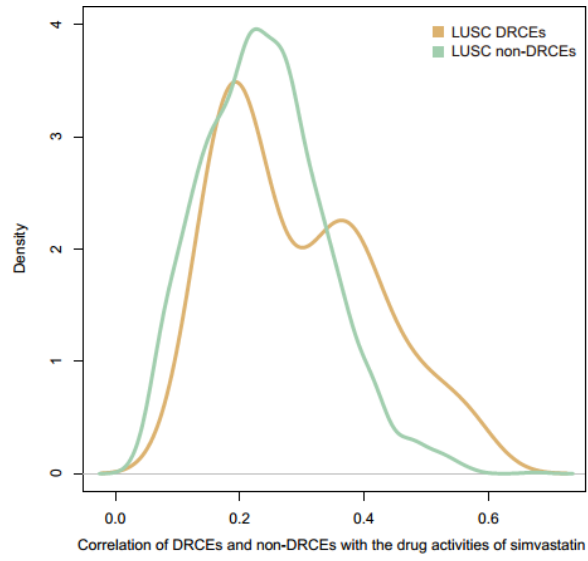

Figure S2. Correlation-density curves of LUSC DRCEs and non-DRCEs.

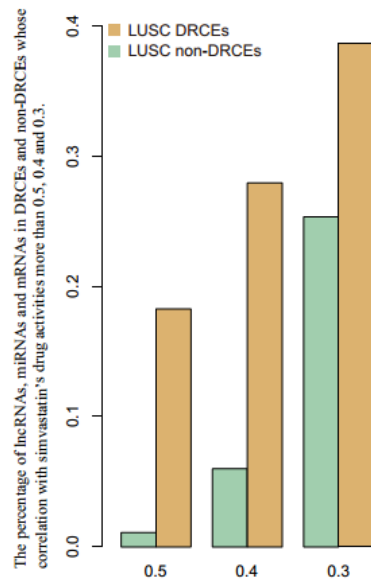

Figure S3. The percentage of lncRNAs, miRNAs and mRNAs in DRCEs and non-DRCEs whose correlation with simvastatin's drug activities more than 0.5, 0.4 and 0.3.

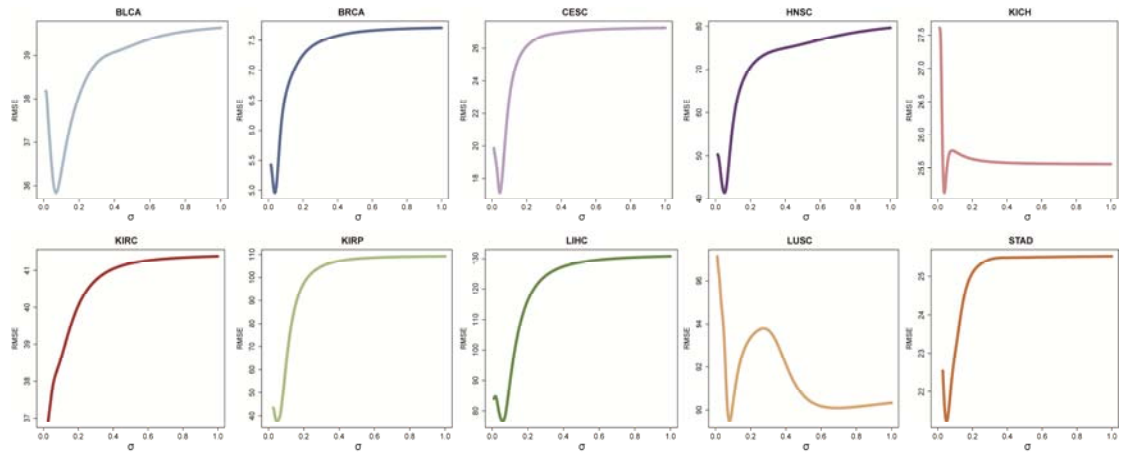

Figure S4. Parameter optimization of the patient-drug two-layer integrated network model. The RMSE range with a change in  $\sigma$  in 10 cancer types.

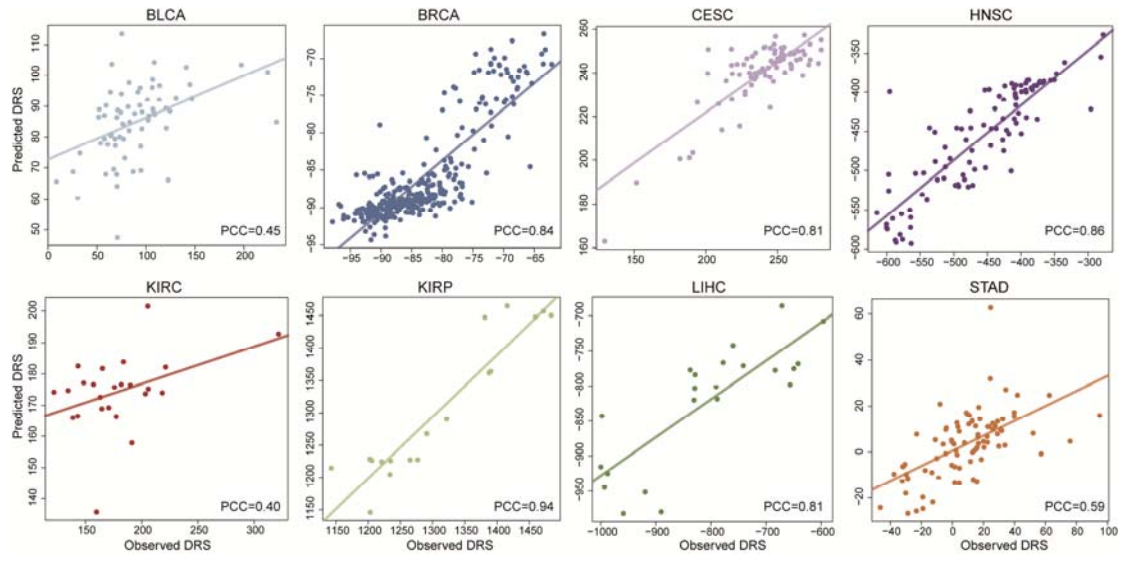

Figure S5. Scatter plots of observed and predicted DRS.

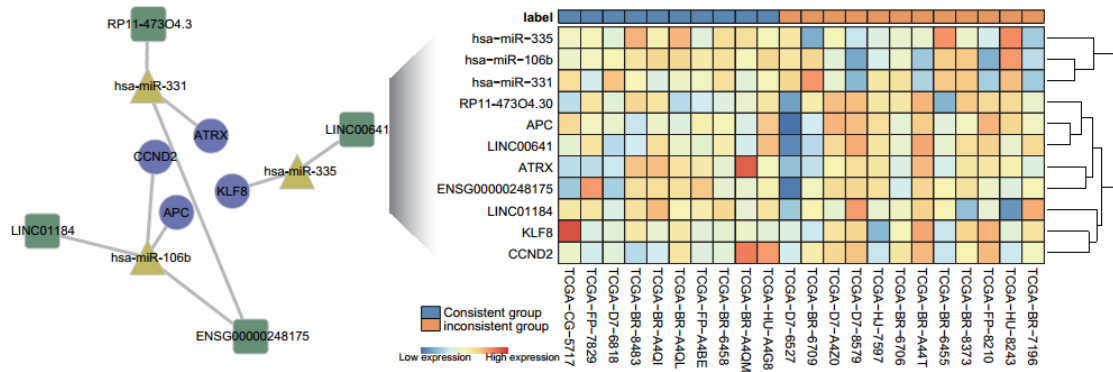

Figure S6. Expression of six STAD DRCEs (hsa-miR-335\_KLF8\_LINC00641,

hsa-miR-106b\_APC\_ENSG00000248175, hsa-miR-106b\_APC\_LINC01184,

hsa-miR-106b\_CCND2\_ENSG00000248175, hsa-miR-331\_ATRX\_ENSG00000248175 and

hsa-miR-331\_ATRX\_RP11-473O4.3) in patients treated with 5-FU.

## References

1. Kozomara, A. and S. Griffiths-Jones, *miRBase: integrating microRNA annotation and deep-sequencing data*. Nucleic Acids Res, 2011. **39**(Database issue): p. D152-7.
2. Derrien, T., et al., *The GENCODE v7 catalog of human long noncoding RNAs: analysis of their gene structure, evolution, and expression*. Genome Res, 2012. **22**(9): p. 1775-89.
3. Jeggari, A., D.S. Marks, and E. Larsson, *miRcode: a map of putative microRNA target sites in the long non-coding transcriptome*. Bioinformatics, 2012. **28**(15): p. 2062-3.
4. Liu, K., et al., *Linc2GO: a human LincRNA function annotation resource based on ceRNA hypothesis*. Bioinformatics, 2013. **29**(17): p. 2221-2.
5. Jalali, S., et al., *Systematic transcriptome wide analysis of lncRNA-miRNA interactions*. PLoS One, 2013. **8**(2): p. e53823.
6. Friedman, R.C., et al., *Most mammalian mRNAs are conserved targets of microRNAs*. Genome Res, 2009. **19**(1): p. 92-105.
7. Kertesz, M., et al., *The role of site accessibility in microRNA target recognition*. Nat Genet, 2007. **39**(10): p. 1278-84.
8. Betel, D., et al., *The microRNA.org resource: targets and expression*. Nucleic Acids Res, 2008. **36**(Database issue): p. D149-53.
9. Rehmsmeier, M., et al., *Fast and effective prediction of microRNA/target duplexes*. RNA, 2004. **10**(10): p. 1507-17.
10. Paraskevopoulou, M.D., et al., *DIANA-LncBase: experimentally verified and computationally predicted microRNA targets on long non-coding RNAs*. Nucleic Acids Res, 2013. **41**(Database issue): p. D239-45.
11. Li, J.H., et al., *starBase v2.0: decoding miRNA-ceRNA, miRNA-ncRNA and protein-RNA interaction networks from large-scale CLIP-Seq data*. Nucleic Acids Res, 2014. **42**(Database issue): p. D92-7.
12. Vergoulis, T., et al., *TarBase 6.0: capturing the exponential growth of miRNA targets with experimental support*. Nucleic Acids Res, 2012. **40**(Database issue): p. D222-9.
13. Hsu, S.D., et al., *miRTarBase update 2014: an information resource for experimentally validated miRNA-target interactions*. Nucleic Acids Res, 2014. **42**(Database issue): p. D78-85.
14. Tan, J.Y., et al., *Extensive microRNA-mediated crosstalk between lncRNAs and mRNAs in mouse embryonic stem cells*. Genome Res, 2015. **25**(5): p. 655-66.
15. Sumazin, P., et al., *An extensive microRNA-mediated network of RNA-RNA interactions regulates established oncogenic pathways in glioblastoma*. Cell, 2011. **147**(2): p. 370-81.
16. Ala, U., et al., *Integrated transcriptional and competitive endogenous RNA networks are cross-regulated in permissive molecular environments*. Proc Natl Acad Sci U S A, 2013. **110**(18): p. 7154-9.
17. Karreth, F.A., et al., *In vivo identification of tumor-suppressive PTEN ceRNAs in an oncogenic BRAF-induced mouse model of melanoma*. Cell, 2011. **147**(2): p. 382-95.
